# Supplementary material
Source: publisher figshare collection journal article supplement (https://sage.figshare.com/ndownloader/files/15618956)
Supplement: Supplementary file 1 [file 15618956]

## TO BE PUBLISHED ONLINE ONLY

Figure 1. Basic characteristics of LAs in England and Spain

|                     |                   | English LAs                     | Spanish LAs                                                                     |
|---------------------|-------------------|---------------------------------|---------------------------------------------------------------------------------|
| Public Services     |                   | Provide all the public services | Provide the same public services as the English LAs except health and education |
| Political Structure |                   | Leader + cabinet                | Leader + cabinet                                                                |
| Political Ideology  |                   | 57% left-wing                   | 72% right-wing                                                                  |
| Funding             | Government Grants | 58%                             | 33%                                                                             |
|                     | Local taxes       | 22%                             | 42%                                                                             |
|                     | Other*            | 20%                             | 25%                                                                             |
| Education           |                   | 28%**                           |                                                                                 |
| Public Health       |                   | -0.1%***                        |                                                                                 |
| LAs with deficit    |                   | 68%                             | 6%                                                                              |

Source: English LAs: LGA ([www.local.gov.uk](http://www.local.gov.uk)); Spanish LAs: BOE ([www.boe.es](http://www.boe.es)). [www.minhafp.gob.es](http://www.minhafp.gob.es). [administracion.gob.es](http://administracion.gob.es)

Data for 2014

LA: Local authority

\* Such as interest payments, capital receipts, sales, fees and charges

\*\* % of the net cost of services. This percentage is positive because in all the English LAs the cost of the service is higher than the corresponding revenue.

\*\*\* % of the net cost of services. This percentage is negative because in most English LAs the revenue from the service covers the cost.

Figure 2. Financial sustainability

| Concept                                                                                                   | Amount          |
|-----------------------------------------------------------------------------------------------------------|-----------------|
| Income statement for the financial year obtained by applying the current IPSAS                            | (1)             |
| + Negative entries for extraordinary activities                                                           | (2)             |
| - Positive entries for extraordinary activities                                                           | (3)             |
| Corrected income statement for the financial year (intergenerational equity for financial sustainability) | (1) + (2) – (3) |

Figure 3. Variables

| Variables                                           | Acronym | Description                                                                                                                                                                                                    | Source                                  | Calculation                                                                                           |
|-----------------------------------------------------|---------|----------------------------------------------------------------------------------------------------------------------------------------------------------------------------------------------------------------|-----------------------------------------|-------------------------------------------------------------------------------------------------------|
| Dependent Variable                                  |         |                                                                                                                                                                                                                |                                         |                                                                                                       |
| Financial Sustainability                            | FS      | Adjusted Income Statement results per capita                                                                                                                                                                   | LA financial statement <sup>1 2 3</sup> | Corrected income statement for the financial year per capita                                          |
| Independent Variables                               |         |                                                                                                                                                                                                                |                                         |                                                                                                       |
| RQ 1: Institutional and Macroeconomic Variables     |         |                                                                                                                                                                                                                |                                         |                                                                                                       |
| Administrative Culture (H1)                         | AC      | Administrative tradition and organizational culture of the LAs                                                                                                                                                 | Dichotomic variable. Own elaboration    | 1= Spanish LAs<br>0=English LAs                                                                       |
| Competences (H2)                                    | COMP    | Services that each LA provides to citizens                                                                                                                                                                     | LA financial statement <sup>1 2 3</sup> | Services costs per capita                                                                             |
| Funding Scheme (H2)                                 | GG      | % of the Public revenues obtained by Government Grants                                                                                                                                                         | LA financial statement <sup>1 2 3</sup> | Government Grants/Total public revenues * 100                                                         |
|                                                     | LT      | % of the Public revenues obtained by Local taxes                                                                                                                                                               | LA financial statement <sup>1 2 3</sup> | Local taxes/Total public revenues * 100                                                               |
|                                                     | OT      | % of the Public revenues obtained by other sources                                                                                                                                                             | LA financial statement <sup>1 2 3</sup> | Revenues of other sources/Total public revenues * 100                                                 |
| Political control (H3)                              | OP      | % of right-wing parties                                                                                                                                                                                        | Historical data <sup>1 2 3</sup>        | Number of right-wing parties/Total of LAs*100                                                         |
| Credit Risk Premium (H4)                            | CRP     | Difference between Spanish and German Treasury bond price.                                                                                                                                                     | European Central Bank                   | Annual average of the Risk premium of each country                                                    |
| Economic Level (H5)                                 | EC      | GDP per capita <sup>*</sup>                                                                                                                                                                                    | INE <sup>1</sup> ;ONS <sup>2</sup>      | GDP/Labour force                                                                                      |
| Political Stability (H6)                            | PS      | Measures perceptions of the likelihood of political instability and/or politically-motivated violence. including terrorism                                                                                     | The World Bank Group                    | Estimate of governance (ranges from approximately -2.5 (weak) to 2.5 (strong) governance performance) |
| Government Effectiveness (H7)                       | GE      | Captures perceptions of the quality of public services. the degree of LA' s independence from political pressures. the credibility of the government's commitment to such policies                             | The World Bank Group                    | Estimate of governance (ranges from approximately -2.5 (weak) to 2.5 (strong) governance performance) |
| Regulatory Quality (H8)                             | RQ      | Captures perception of the LA' s ability to formulate and implement regulations that permit and promote private sector development                                                                             | The World Bank Group                    | Estimate of governance (ranges from approximately -2.5 (weak) to 2.5 (strong) governance performance) |
| The rule of law (H9)                                | RL      | Captures perceptions of the extent to which agents have confidence in and abide by the rules of society. and in particular the quality of contract enforcement. property rights. the police and the courts.    | The World Bank Group                    | Estimate of governance (ranges from approximately -2.5 (weak) to 2.5 (strong) governance performance) |
| The control of corruption (H10)                     | CC      | Captures perceptions of the extent to which public power is exercised for private gain. including both petty and grand forms of corruption. as well as "capture" of the state by elites and private interests. | The World Bank Group                    | Estimate of governance (ranges from approximately -2.5 (weak) to 2.5 (strong) governance performance) |
| RQ2: Microeconomic Variables: Demographic Variables |         |                                                                                                                                                                                                                |                                         |                                                                                                       |

|                                                       |        |                                                             |                                                           |                                             |
|-------------------------------------------------------|--------|-------------------------------------------------------------|-----------------------------------------------------------|---------------------------------------------|
| Population (H11)                                      | LN_POP | Population residing in the Local Authority                  | INE <sup>1</sup> ; ONS <sup>2</sup>                       | Neperian logarithm of the population        |
| Population density (H12)                              | PD     | Population residing in the municipality per km <sup>2</sup> | INE <sup>1</sup> ; ONS <sup>2</sup>                       | Population divided by km <sup>2</sup>       |
| Dependent population 16 years (H13)                   | DP16   | Population aged under 16 years residing in the municipality | INE <sup>1</sup> ; ONS <sup>2</sup>                       | Population aged under 16 years/Labour force |
| Dependent population 65 years (H14)                   | DP65   | Population aged over 65 years residing in the municipality  | INE <sup>1</sup> ; ONS <sup>2</sup>                       | Population aged over 65 years/Labour force  |
| Immigrant population (H15)                            | IP     | Immigrant population residing in the municipality           | INE <sup>1</sup> ; ONS <sup>2</sup>                       | % Immigrant population                      |
| RQ2: Microeconomic Variables; Socioeconomic Variables |        |                                                             |                                                           |                                             |
| Unemployment rate (H16)                               | UR     | Unemployment rate in the municipality                       | SEPE <sup>1</sup> ; ONS <sup>2</sup> ; Nomis <sup>3</sup> | Unemployed population /Labour force         |
| Business Count (H17)                                  | BC     | Business count                                              | Business Register <sup>1</sup> ; Nomis <sup>2</sup>       | Business /1000 inhabitants                  |

Note: LA: Local authority

INE: Statistic Institute of Spain ([www.ine.es](http://www.ine.es))

SEPE: Public Employment Service of Spain ([www.sepe.es](http://www.sepe.es))

Business Register: ([www.rmc.es](http://www.rmc.es))

ONS: Office for National Statistics ([www.ons.gov.uk](http://www.ons.gov.uk))

Nomis: official labour market statistics ([www.nomisweb.co.uk](http://www.nomisweb.co.uk))

Note 1: Spanish data source; 2: English data sources; 3: Data obtained from the website of each LA; \* We used the English Local Authorities GVA per capita as a proxy of the GDP.

Source: Own elaboration

### A) English local authorities microeconomic model: demographic and socioeconomic factors

## B) Spanish local authorities microeconomic model: demographic and socioeconomic factors

where “i” is the i-th transversal unit (English or Spanish LAs) and “t” is the time (year).

|                   | English LAs (Model A)                    |       | Spanish LAs (Model B)                    |       |
|-------------------|------------------------------------------|-------|------------------------------------------|-------|
|                   | Demographic and Socio-Economic model (1) |       | Demographic and Socio-Economic model (2) |       |
|                   | z                                        | P     | z                                        | P     |
| Arellano test (1) | -4.35                                    | 0     | -6.17                                    | 0     |
| Arellano test (2) | 1.25                                     | 0.21  | -0.49                                    | 0.621 |
|                   | Chi2                                     | P     | Chi2                                     | P     |
| Hansen test       | chi2(47)=46.77                           | 0.482 | chi2(39)=45.88                           | 0.208 |
| Instruments       | 53                                       |       | 56                                       |       |
| Groups            | 55                                       |       | 138                                      |       |

The Hansen test of over-identifying restrictions confirms the validity of the instruments used.

|                                           |         |         | English Local Authorities |           |           |          | Spanish Local Authorities |           |           |          |
|-------------------------------------------|---------|---------|---------------------------|-----------|-----------|----------|---------------------------|-----------|-----------|----------|
| Variable                                  | Acronym |         | Mean                      | Std. Dev. | Min       | Max      | Mean                      | Std. Dev. | Min       | Max      |
| Financial Sustainability                  |         | overall |                           | 265.6799  | -1119.879 | 800.1127 |                           | 167.3197  | -558.69   | 841.17   |
|                                           | FS      | between | -134.1163                 | 112.3651  | -579.2166 | 189.9312 | 107.8106                  | 94.252    | -258.43   | 348.3257 |
|                                           |         | within  |                           | 241.1548  | -1097.254 | 777.8538 |                           | 140.814   | -608.7794 | 822.0431 |
| Institutional and Macroeconomic Variables |         |         |                           |           |           |          |                           |           |           |          |

|                                          |        |         |          |          |          |          |          |          |          |          |
|------------------------------------------|--------|---------|----------|----------|----------|----------|----------|----------|----------|----------|
| Administrative Culture (H1)              | AC     |         | 0        | 0        | 0        | 0        | 1        | 0        | 1        | 1        |
| Competences (H2)                         | COMP   |         | 1385.924 | 183.3033 | 1089.946 | 1627.474 | 706.5629 | 93.4353  | 562.2238 | 838.0533 |
| Funding Scheme (H2)                      | GG     |         | 0.6475   | 0.0323   | 0.59     | 0.7      | 0.3767   | 0.0422   | 0.31     | 0.45     |
|                                          | LT     |         | 0.1975   | 0.0083   | 0.19     | 0.21     | 0.3156   | 0.053    | 0.26     | 0.4      |
|                                          | OT     |         | 0.155    | 0.0292   | 0.11     | 0.19     | 0.3067   | 0.0474   | 0.25     | 0.39     |
| Political Control (H3)                   | OP     |         | 0.4889   | 0.0529   | 0.38     | 0.55     | 0.5744   | 0.1308   | 0.45     | 0.72     |
| Credit Risk Premium (H4)                 | CRP    |         | 65.032   | 29.9046  | 30.1043  | 127.9963 | 158.6251 | 140.0874 | 1.6393   | 431.5869 |
| Economic Level (H5)                      | EC     |         | 32288.89 | 2872.066 | 27600    | 36600    | 23128.89 | 582.652  | 22518    | 24300    |
| Political Stability (H6)                 | PS     |         | 0.4365   | 0.1446   | 0.1216   | 0.6692   | -0.1502  | 0.2178   | -0.4738  | 0.2431   |
| Government Effectiveness (H7)            | GE     |         | 1.5858   | 0.0600   | 1.4955   | 1.6710   | 1.0171   | 0.1043   | 0.8372   | 1.1597   |
| Regulatory Quality (H8)                  | RQ     |         | 1.7451   | 0.0923   | 1.5843   | 1.8666   | 1.0783   | 0.1569   | 0.7505   | 1.2548   |
| The rule of law (H9)                     | RL     |         | 1.7443   | 0.0629   | 1.6507   | 1.8896   | 1.1200   | 0.0827   | 0.9526   | 1.1981   |
| The control of corruption (H10)          | CC     |         | 1.6869   | 0.0595   | 1.6048   | 1.7923   | 1.0416   | 0.1658   | 0.6298   | 1.1902   |
| Microeconomic Variables                  |        |         |          |          |          |          |          |          |          |          |
| Population (H11)                         | LN_POP | overall |          | 0.4567   | 10.51    | 13.21    |          | 0.7368   | 10.42    | 15       |
|                                          |        | between | 12.195   | 0.4598   | 10.5289  | 13.1833  | 11.601   | 0.7383   | 10.4656  | 14.9822  |
|                                          |        | within  |          | 0.0227   | 12.1139  | 12.2606  |          | 0.0375   | 11.3399  | 11.761   |
| Population Density (H12)                 | PD     | overall |          | 1573.393 | 62.1     | 5174.09  |          | 3093.868 | 51.55    | 18474.43 |
|                                          |        | between | 1639.828 | 1584.922 | 62.7756  | 5007.913 | 2326.146 | 3102.627 | 53.5233  | 18175.84 |
|                                          |        | within  |          | 65.3494  | 1296.762 | 1911.793 |          | 88.1827  | 1530.875 | 2904.835 |
| Dependent population under 16 rate (H13) | DP16   | overall |          | 2.8406   | 22.92    | 38.27    |          | 3.3563   | 15.44    | 33.61    |
|                                          |        | between | 29.5034  | 2.808    | 23.3222  | 36.95    | 23.8924  | 3.2365   | 16.8922  | 33.1244  |
|                                          |        | within  |          | 0.5586   | 27.2945  | 32.3546  |          | 0.9262   | 19.5602  | 27.7191  |
| Dependent population over 65 rate (H14)  | DP65   | overall |          | 6.2038   | 13.69    | 43.66    |          | 6.5546   | 5.21     | 43.12    |
|                                          |        | between | 25.7149  | 6.0325   | 14.4011  | 40.0056  | 21.8223  | 6.3508   | 6.0778   | 36.7378  |
|                                          |        | within  |          | 1.6386   | 20.886   | 30.126   |          | 1.6998   | 15.4978  | 29.0512  |
| % foreign people (H15)                   | INM    | overall |          | 4.8955   | 0.33     | 24.82    |          | 9.5201   | 0.94     | 53.54    |
|                                          |        | between | 6.2323   | 4.7277   | 0.7463   | 21.0433  | 12.8915  | 9.4574   | 1.2189   | 51.6389  |
|                                          |        | within  |          | 1.3958   | 0.5967   | 12.6367  |          | 1.3294   | 4.9359   | 16.6948  |
| Unemployment rate (H16)                  | UR     | overall |          | 2.755    | 1.44     | 16.99    |          | 4.9826   | 3.12     | 27.38    |
|                                          |        | between | 6.9462   | 2.2555   | 3.82     | 12.48    | 12.3889  | 3.1237   | 5        | 21.1378  |
|                                          |        | within  |          | 1.6091   | 2.1217   | 11.4562  |          | 3.8899   | 3.3444   | 20.2766  |
| Business unit count (H17)                | BC     | overall |          | 9.1566   | 18.6578  | 65.1597  |          | 9.9558   | 5.32     | 72.74    |
|                                          |        | between | 37.2612  | 8.6989   | 23.6802  | 61.1529  | 26.557   | 9.0957   | 7.1913   | 60.5975  |
|                                          |        | within  |          | 3.0655   | 28.7355  | 42.7042  |          | 4.1122   | 13.5932  | 40.1682  |

Note: Financial sustainability and Microeconomic Variables at local levels. Data used: 138 Spanish LAs and 55 English LAs (neither Welsh nor Scottish LAs are included)

Institutional and Macroeconomic variables at national level.

Figure 7. Institutional and macroeconomic models

|                |         | English LAs        | Spanish LAs        |
|----------------|---------|--------------------|--------------------|
| Variable       | Acronym | Correlation Matrix | Correlation Matrix |
| Competences    | COMP    | -0.1858 *          | 0.1188 *           |
| Funding Scheme | GG      | -0.1848 *          | 0.181 *            |
|                | LT      | 0.1458 *           | -0.0767            |

|                           |     |          |           |
|---------------------------|-----|----------|-----------|
|                           | OT  | 0.2202 * | -0.0893 * |
| Political Control         | OP  | 0.0399   | -0.1501 * |
| Credit Risk Premium       | CRP | -0.0829  | -0.1299 * |
| Economic Level            | EC  | 0.0726 * | 0.0908 *  |
| Political Stability       | PS  | 0.2303 * | -0.0426   |
| Government Effectiveness  | GE  | 0.0274   | -0.1321 * |
| Regulatory Quality        | RQ  | 0.0127   | 0.0071    |
| The rule of law           | RL  | -0.0518  | -0.0538   |
| The control of corruption | CC  | 0.0398   | -0.1079 * |
| Culture Administrative    | CA  | 0.4742 * |           |

(1) Coefficients obtained from Pearson's matrix of correlations. Linear relationship with financial sustainability.

(2) Stata 12: \*P-value < 0.05

(3) The variable Administrative Culture was analysed using English and Spanish LAs in the same correlation matrix to determine its possible influence in the financial sustainability of these LAs.

(4) To exclude information which is irrelevant to this study, we only include the Pearson coefficients which show the linear relationship between the dependent variable (Financial sustainability) and the independent variables (institutional and macroeconomic variables).

Figure 8. The models

|           | English LAs (Model A)    | Spanish LAs (Model B)  |
|-----------|--------------------------|------------------------|
| Acronym   | Model (1)                | Model (2)              |
| FS_L1.    | 0.15 ***                 | 0.18 **                |
| LN_POP    | -200.11 ***              | -388.49 **             |
| PD        | -0.06                    | -0.035                 |
| DP16      | -55.82 ***               | -47.34 ***             |
| DP65      | -5.52                    | 11.75                  |
| INM       | -20.29                   | -8.76 *                |
| UR        | -50.65 **                | -10.58*                |
| BC        | -22.96 **                | 10.25                  |
| _cons     | 5664.63 ***              | 3073.5 **              |
| Wald test | Chi2(16)=12601.01<br>P=0 | chi2(16)=638.17<br>P=0 |

Note: (1)GMM-Dynamic Panel data–Two Step

(2) Fixed effect of time considered; All independent variables are considered as endogenous variables

(3) The 'collapse' option was used in order to reduce the instruments (Roodman. 2009)

(4) Stata 12:\*P-value < 0.10.\*\* P-value < 0.05.\*\*\* P-value < 0.01
